# Supplementary material for: Durable and efficient BTC-assisted 2D/0D Al–Ni-MOF nanostructures for modern electrochemical energy systems
Source: Royal Society of Chemistry journal article supplement (doi:10.1039/d5nr02303c), 2025-01-01
Supplement: d5nr02303c1.pdf [file d5nr02303c1.pdf]

## Supplementary Information

### **Durable and efficient BTC-assisted 2D/0D of Al-Ni-MOF nanostructures for modern electrochemical energy systems**

Xiaolong Leng<sup>a,#</sup>, S. V. Prabhakar Vattikuti<sup>b,#</sup>, Mohan Rao Tamtam<sup>c,\*</sup>, Jaesool Shim<sup>a,\*</sup>, Huynh Thanh Liem<sup>d,e,\*</sup>, Nam Nguyen Dang<sup>d,e</sup>

<sup>a</sup>School of Mechanical Engineering, Hubei Engineering University, Xiaogan 432000, China.

<sup>b</sup>School of Mechanical Engineering, College of Engineering, Yeungnam University, Gyeongsan 38541, Republic of Korea.

<sup>c</sup>School of Computer Science and Engineering, College of Digital Convergence, Yeungnam University, Gyeongsan 38541, Republic of Korea.

<sup>d</sup>Future Materials & Devices Lab., Institute of Fundamental and Applied Sciences, Duy Tan University, Ho Chi Minh City 70000, Viet Nam.

<sup>e</sup>The Faculty of Environmental and Chemical Engineering, Duy Tan University, Danang 50000, Viet Nam.

\*E-mail: mohanrtam@gmail.com, jshim@ynu.ac.kr, huynhthanhliem@duytan.edu.vn

# Authors equally contributed

## 1.1 Characterization

X-ray diffraction (XRD; PANalytical) experiments were conducted using programmable PANalytical X-ray generator operated at 40 kV and 40 mA. Scanning electron microscopy (SEM; Hitachi-S-4800) was employed to observe the surface morphologies of the catalysts. High-resolution transmission electron microscopy (HRTEM; Tecnai G2 F20 S-Twin) was performed to examine the nanocrystal shape and size. Energy-dispersive X-ray (EDX)-HRTEM was employed to distinguish the individual elements. X-ray photoelectron spectroscopy (XPS; Thermo Scientific photoelectron spectrometer) was employed to define the surface states.

## 1.2 Electrochemical testing

All the electrochemical measurements were carried out on a Biologic Sp-200 electrochemical workstation with a standard three-electrode setup. As-synthesized samples were drop casted on Ni foam and used the working electrode. The Hg/HgO electrode and Platinum mesh were served as the reference electrode and the counter electrode, respectively. CV, galvanostatic charge-discharge (GCD), and EIS were used to assess the electrochemical activity of the electrodes. The CV tests were performed at several scan rates, ranging from 1 to 20 mV/s at a potential of 0 to 0.6 V. The GCD tests were executed within the range of 0 to 0.5 V versus Hg/HgO at various current densities (0.8-4 A/g). All the electrochemical experiments were performed on a Biologic SP-200 electrochemical workstation in a 1.0 M KOH solution.

Specific capacitance ( $C_s$ ) from Galvanostatic charge-discharge can also be calculated as

$$C_s = \frac{I\Delta t}{m\Delta V} \quad (1)$$

where, ' $I$ ' implies current intensity and ' $\Delta t$ ' entails discharge time (t) of the experimental charge-discharge curve. To achieve the mass of active material on each electrode based on their respective capacitance and operating voltage window. The formula is:

$$m^+/m^- = (C^- \times \Delta V^-) / (C^+ \times \Delta V^+) \quad (2)$$

where,  $m^+$  and  $m^-$ : Represent the mass of active material in the positive and negative electrodes,

respectively.  $C^+$  and  $C^-$ : Represent the specific capacitance of the positive and negative electrodes, respectively.  $\Delta V^+$  and  $\Delta V^-$ : Represent the potential window (voltage range) of the positive and negative electrodes, respectively. The optimal mass ratio of positive electrode to negative one was ~0.32.

Further specific energy (E) in Wh/kg associated with specific power (P) in W/kg of electrode were evaluated from the charge-discharge dimensions using the reckoning,

$$E = \frac{1}{2} \left[ \frac{C_s \Delta V^2}{3.6} \right] \quad (3)$$

$$P = \frac{3600 \times E}{\Delta t} \quad (4)$$

### 1.3 PVA-KOH gel electrolyte

In order to prepare the alkaline PVA/KOH gel electrolyte, 3 g of polyvinylalcohol was dissolved in 24 mL of pure deionized water at 90 °C with continuous and vigorous stirring to obtain a clear solution. After 1 h, we obtained a clear viscous solution. KOH (3 g) was liquefied in 6 mL deionized water and then dropped into the cleared PVA solution with continuous stirring until complete dissolution and the formation of a gel-like solution. Finally, the PVA/KOH gel electrolyte was cooled to room temperature for further use.

### 1.4 Asymmetric device preparation procedure (ADs)

For an aqueous asymmetric supercapacitor, the Al-Ni-MOF//AC was used as both positive and negative electrodes. The wide potential window of 0-1.6 V was applied for the two-electrode system and gel electrolyte was used as the electrolyte. The positive electrode (7 mg of active material, 2 mg of carbon black, and 1 mg of PVDF, paste was prepared and drop casted on 14 mm diameter of Ni foam. The paste was then coated on the respective electrodes, and heated at 80°C for 12 h.

(a)

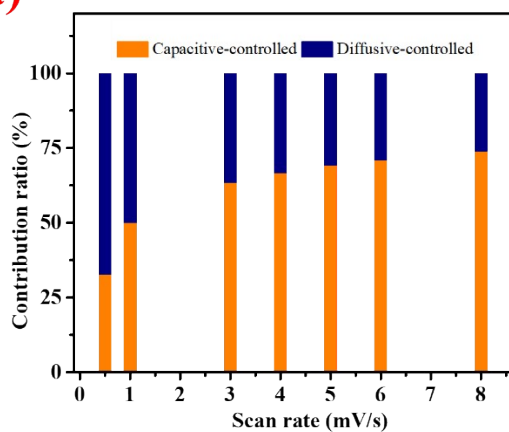

(b)

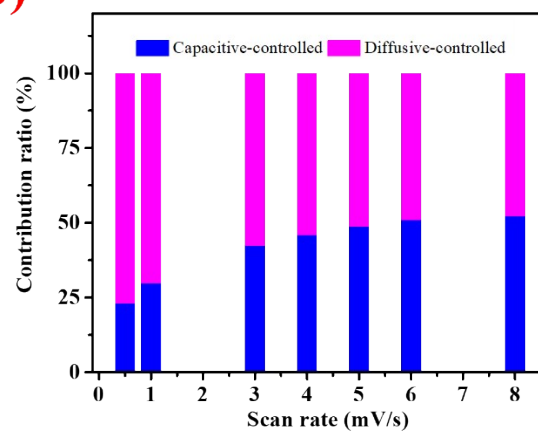

**Fig. S1** Total contribution vs scan rate of (a) Al-MOF and (b) Ni-MOF electrodes.

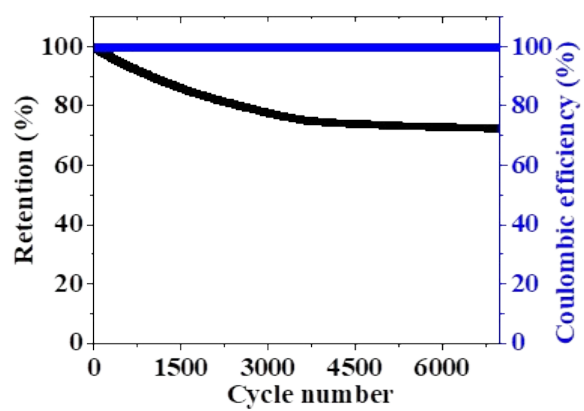

**Fig. S2** Cycling stability and coulombic efficiency of the Al-Ni-MOF electrode.

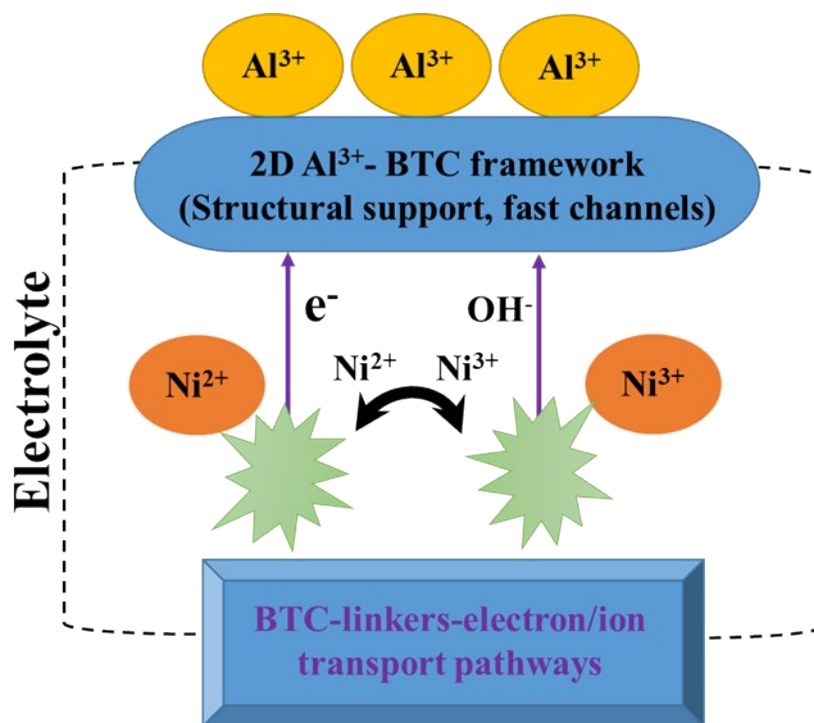

**Fig. S3** Graphical representation of electrochemical storage mechanism of Al-Ni-MOF electrode.

**Table: S1** Comparison of electrochemical activity of Al-Ni-MF electrode and other MOF-based electrodes in previous reports.

| Materials                      | Electrolyte                         | Scan rate or<br>Current density | Sp. Capacitance<br>(F/g)    | References  |
|--------------------------------|-------------------------------------|---------------------------------|-----------------------------|-------------|
| Mn-BDC MOF                     | 1M Na <sub>2</sub> SO <sub>4</sub>  | 1 A/g                           | 178                         | [1]         |
| ZIF-8/PANI                     | 1 M H <sub>2</sub> SO <sub>4</sub>  | 1 A/g                           | 236                         | [2]         |
| Co-Ni-MOF                      | 2 M KOH                             | 5 mA/cm <sup>2</sup>            | 43.6 F/cm <sup>2</sup>      | [3]         |
| Cu MOF/rGO                     | PVA-Na <sub>2</sub> SO <sub>4</sub> | 1 A/g                           | 385                         | [4]         |
| UIO-66/rGO                     | 6 M KOH                             | 0.15 A/g                        | 302                         | [5]         |
| PANI-ZIF-67-CC                 | 3 M KCl                             | 10 mV/s                         | 21.46<br>mF/cm <sup>2</sup> | [6]         |
| ZIF-67/polyprrole<br>nanotubes | 1M Na <sub>2</sub> SO <sub>4</sub>  | 0.5 A/g                         | 597.6                       | [7]         |
| Ni-CoMOF                       | 3 M KOH                             | 1 A/g                           | 236.1<br>mAh/g              | [8]         |
| Al-MOF                         | 1 M KOH                             | 0.8 A/g                         | 112 F/g                     | [This work] |
| Al-Ni-MOF                      | 1 M KOH                             | 0.8 A/g                         | 1631.2 F/g                  | [This work] |

## References:

- [1] Sundriyal, Shashank; Mishra, Sunita; Deep, Akash, Study of Manganese-1,4-Benzenedicarboxylate Metal Organic Framework Electrodes Based Solid State Symmetrical Supercapacitor, *Energy Procedia* (2019), 158, 5817-5824 CODEN: EPNRCV; ISSN:1876-6102. (Elsevier Ltd.).
- [2] Salunkhe, R. R.; Tang, J.; Kobayashi, N.; Kim, J.; Ide, Y.; Tominaka, S.; Kim, J. H.; Yamauchi, Y. Ultrahigh performance supercapacitors utilizing core-shell nanoarchitectures from a metalorganic framework-derived nanoporous carbon and a conducting polymer. *Chem. Sci.* 2016, 7, 5704–5713.
- [3] Jianying Liang, Shumin Qin, Shuang Luo, Yanru Wang, Jinglv Feng, Kang Liu , Shenna Liao, Zhenglong Xu, Jien Li, Epitaxially growing multilayer CoNi-MOFs nanosheets on activated carbon cloth for high-performance asymmetric supercapacitors, *Journal of Power Sources* 618 (2024) 235209.
- [4] Srimuk, P.; Luanwuthi, S.; Krittayavathananon, A.; Sawangphruk, M. Solid-type supercapacitor of reduced graphene oxide-metal organic framework composite coated on carbon fiber paper. *Electrochim. Acta* 2015, 157, 69–77.
- [5] Mao, M. L.; Sun, L. X.; Xu, F. Metal–Organic Frameworks/ Carboxyl Graphene Derived Porous Carbon as a Promising Supercapacitor Electrode Material. *Key Engineering Materials; Trans Tech Publ*, 2017; pp 756–763.
- [6] L. Wang, X. Feng, L. Ren, Q. Piao, J. Zhong, Y. Wang, H. Li, Y. Chen and B. Wang, *J. Am. Chem. Soc.*, 2015, 137, 4920–4923.
- [7] Xu, X.; Tang, J.; Qian, H.; Hou, S.; Bando, Y.; Hossain, M. S. A.; Pan, L.; Yamauchi, Y. Three-Dimensional Networked Metal- Organic Frameworks with Conductive Polypyrrole Tubes for Flexible Supercapacitors. *ACS Appl. Mater. Interfaces* 2017, 9, 38737–38744.
- [8] Y. Jiao, J. Pei, D. Chen, C. Yan, Y. Hu, Q. Zhang and G. Chen, Mixed-metallic MOF based electrode materials for high performance hybrid supercapacitors, *J. Mater. Chem. A*, 2017, 5, 1094–1102.
